# Supplementary material for: Fine structure of a partition in the spike glycoprotein encoded in the SARS-CoV-2 genome
Source: Research Square preprint supplement (doi:10.21203/rs.3.rs-2236542/v1), 2022-11-15
Supplement: Supplementary file 1 [file 9cbf8880cac2ca7897837de6.pdf]

## Supplementary materials

Table S1: Full details of the genetic code organization (amino acid numbers 1–1274) in the S-protein gene of Table 2. The genome codes (1274 codes) were divided into seven classes (classes 1–6 had 200 codes each; class 7 had 74 codes).

Class 1: Amino acids 1–200

| Amino acid No.<br>1-100 | Codons | Codon No. •<br>Amino acid | Plane No.<br>in Figure 1 | Amino acid No.<br>101-200 | Codons | Codon No. •<br>Amino acid | Plane No.<br>in Figure 1 |
|-------------------------|--------|---------------------------|--------------------------|---------------------------|--------|---------------------------|--------------------------|
| 1                       | ATG    | 45M                       | 3rd                      | 101                       | ATA    | 29I                       | 2nd                      |
| 2                       | TTT    | 63F                       | 4th                      | 102                       | AGA    | 25R                       | 2nd                      |
| 3                       | GTT    | 62V                       | 4th                      | 103                       | GGC    | 10G                       | 1st                      |
| 4                       | TTT    | 63F                       | 4th                      | 104                       | TGG    | 43W                       | 3rd                      |
| 5                       | CTT    | 60L                       | 4th                      | 105                       | ATT    | 61I                       | 4th                      |
| 6                       | GTT    | 62V                       | 4th                      | 106                       | TTT    | 63F                       | 4th                      |
| 7                       | TTA    | 31L                       | 2nd                      | 107                       | GGT    | 58G                       | 4th                      |
| 8                       | TTG    | 47L                       | 3rd                      | 108                       | ACT    | 49T                       | 4th                      |
| 9                       | CCA    | 16P                       | 2nd                      | 109                       | ACT    | 49T                       | 4th                      |
| 10                      | CTA    | 28L                       | 2nd                      | 110                       | TTA    | 31L                       | 2nd                      |
| 11                      | GTC    | 14V                       | 1st                      | 111                       | GAT    | 54D                       | 4th                      |
| 12                      | TCT    | 51S                       | 4th                      | 112                       | TCG    | 35S                       | 3rd                      |
| 13                      | AGT    | 57S                       | 4th                      | 113                       | AAG    | 37K                       | 3rd                      |
| 14                      | CAG    | 36Q                       | 3rd                      | 114                       | ACC    | 1T                        | 1st                      |
| 15                      | TGT    | 59C                       | 4th                      | 115                       | CAG    | 36Q                       | 3rd                      |
| 16                      | GTT    | 62V                       | 4th                      | 116                       | TCC    | 3S                        | 1st                      |
| 17                      | AAT    | 53N                       | 4th                      | 117                       | CTA    | 28L                       | 2nd                      |
| 18                      | CTT    | 60L                       | 4th                      | 118                       | CTT    | 60L                       | 4th                      |
| 19                      | ACA    | 17T                       | 2nd                      | 119                       | ATT    | 61I                       | 4th                      |
| 20                      | ACC    | 1T                        | 1st                      | 120                       | GTT    | 62V                       | 4th                      |
| 21                      | AGA    | 25R                       | 2nd                      | 121                       | AAT    | 53N                       | 4th                      |
| 22                      | ACT    | 49T                       | 4th                      | 122                       | AAC    | 5N                        | 1st                      |
| 23                      | CAA    | 20Q                       | 2nd                      | 123                       | GCT    | 50A                       | 4th                      |
| 24                      | TTA    | 31L                       | 2nd                      | 124                       | ACT    | 49T                       | 4th                      |
| 25                      | CCC    | 0P                        | 1st                      | 125                       | AAT    | 53N                       | 4th                      |
| 26                      | CCT    | 48P                       | 4th                      | 126                       | GTT    | 62V                       | 4th                      |
| 27                      | GCA    | 18A                       | 2nd                      | 127                       | GTT    | 62V                       | 4th                      |
| 28                      | TAC    | 7Y                        | 1st                      | 128                       | ATT    | 61I                       | 4th                      |
| 29                      | ACT    | 49T                       | 4th                      | 129                       | AAA    | 21K                       | 2nd                      |
| 30                      | AAT    | 53N                       | 4th                      | 130                       | GTC    | 14V                       | 1st                      |
| 31                      | TCT    | 51S                       | 4th                      | 131                       | TGT    | 59C                       | 4th                      |

|    |     |      |     |     |     |     |     |
|----|-----|------|-----|-----|-----|-----|-----|
| 32 | TTC | 15F  | 1st | 132 | GAA | 22E | 2nd |
| 33 | ACA | 17T  | 2nd | 133 | TTT | 63F | 4th |
| 34 | CGT | 56R  | 4th | 134 | CAA | 20Q | 2nd |
| 35 | GGT | 58G  | 4th | 135 | TTT | 63F | 4th |
| 36 | GTT | 62V  | 4th | 136 | TGT | 59C | 4th |
| 37 | TAT | 55Y  | 4th | 137 | AAT | 53N | 4th |
| 38 | TAC | 7Y   | 1st | 138 | GAT | 54D | 4th |
| 39 | CCT | 48P  | 4th | 139 | CCA | 16P | 2nd |
| 40 | GAC | 6D   | 1st | 140 | TTT | 63F | 4th |
| 41 | AAA | 21K  | 2nd | 141 | TTG | 47L | 3rd |
| 42 | GTT | 62V  | 4th | 142 | GGT | 58G | 4th |
| 43 | TTC | 15F  | 1st | 143 | GTT | 62V | 4th |
| 44 | AGA | 25R  | 2nd | 144 | TAT | 55Y | 4th |
| 45 | TCC | 3S   | 1st | 145 | TAC | 7Y  | 1st |
| 46 | TCA | 19S  | 2nd | 146 | CAC | 4H  | 1st |
| 47 | GTT | 62V  | 4th | 147 | AAA | 21K | 2nd |
| 48 | TTA | 31L  | 2nd | 148 | AAC | 5N  | 1st |
| 49 | CAT | 52H  | 4th | 149 | AAC | 5N  | 1st |
| 50 | TCA | 19S  | 2nd | 150 | AAA | 21K | 2nd |
| 51 | ACT | 49T  | 4th | 151 | AGT | 57S | 4th |
| 52 | CAG | 36Q  | 3rd | 152 | TGG | 43W | 3rd |
| 53 | GAC | 6D   | 1st | 153 | ATG | 45M | 3rd |
| 54 | TTG | 47L  | 3rd | 154 | GAA | 22E | 2nd |
| 55 | TTC | 15F  | 1st | 155 | AGT | 57S | 4th |
| 56 | TTA | 31L  | 2nd | 156 | GAG | 38E | 3rd |
| 57 | CCT | 48P  | 4th | 157 | TTC | 15F | 1st |
| 58 | TTC | 15F  | 1st | 158 | AGA | 25R | 2nd |
| 59 | TTT | 63F  | 4th | 159 | GTT | 62V | 4th |
| 60 | TCC | 3S   | 1st | 160 | TAT | 55Y | 4th |
| 61 | AAT | 53N  | 4th | 161 | TCT | 51S | 4th |
| 62 | GTT | 62V  | 4th | 162 | AGT | 57S | 4th |
| 63 | ACT | 49T  | 4th | 163 | GCG | 34A | 3rd |
| 64 | TGG | 43W  | 3rd | 164 | AAT | 53N | 4th |
| 65 | TTC | 15F  | 1st | 165 | AAT | 53N | 4th |
| 66 | CAT | 52H  | 4th | 166 | TGC | 11C | 1st |
| 67 | GCT | 50A  | 4th | 167 | ACT | 49T | 4th |
| 68 | ATA | 29 I | 2nd | 168 | TTT | 63F | 4th |
| 69 | CAT | 52H  | 4th | 169 | GAA | 22E | 2nd |
| 70 | GTC | 14V  | 1st | 170 | TAT | 55Y | 4th |
| 71 | TCT | 51S  | 4th | 171 | GTC | 14V | 1st |
| 72 | GGG | 42G  | 3rd | 172 | TCT | 51S | 4th |
| 73 | ACC | 1T   | 1st | 173 | CAG | 36Q | 3rd |

|     |     |     |     |     |     |     |     |
|-----|-----|-----|-----|-----|-----|-----|-----|
| 74  | AAT | 53N | 4th | 174 | CCT | 48P | 4th |
| 75  | GGT | 58G | 4th | 175 | TTT | 63F | 4th |
| 76  | ACT | 49T | 4th | 176 | CTT | 60L | 4th |
| 77  | AAG | 37K | 3rd | 177 | ATG | 45M | 3rd |
| 78  | AGG | 41R | 3rd | 178 | GAC | 6D  | 1st |
| 79  | TTT | 63F | 4th | 179 | CTT | 60L | 4th |
| 80  | GAT | 54D | 4th | 180 | GAA | 22E | 2nd |
| 81  | AAC | 5N  | 1st | 181 | GGA | 26G | 2nd |
| 82  | CCT | 48P | 4th | 182 | AAA | 21K | 2nd |
| 83  | GTC | 14V | 1st | 183 | CAG | 36Q | 3rd |
| 84  | CTA | 28L | 2nd | 184 | GGT | 58G | 4th |
| 85  | CCA | 16P | 2nd | 185 | AAT | 53N | 4th |
| 86  | TTT | 63F | 4th | 186 | TTC | 15F | 1st |
| 87  | AAT | 53N | 4th | 187 | AAA | 21K | 2nd |
| 88  | GAT | 54D | 4th | 188 | AAT | 53N | 4th |
| 89  | GGT | 58G | 4th | 189 | CTT | 60L | 4th |
| 90  | GTT | 62V | 4th | 190 | AGG | 41R | 3rd |
| 91  | TAT | 55Y | 4th | 191 | GAA | 22E | 2nd |
| 92  | TTT | 63F | 4th | 192 | TTT | 63F | 4th |
| 93  | GCT | 50A | 4th | 193 | GTG | 46V | 3rd |
| 94  | TCC | 3S  | 1st | 194 | TTT | 63F | 4th |
| 95  | ACT | 49T | 4th | 195 | AAG | 37K | 3rd |
| 96  | GAG | 38E | 3rd | 196 | AAT | 53N | 4th |
| 97  | AAG | 37K | 3rd | 197 | ATT | 61I | 4th |
| 98  | TCT | 51S | 4th | 198 | GAT | 54D | 4th |
| 99  | AAC | 5N  | 1st | 199 | GGT | 58G | 4th |
| 100 | ATA | 29I | 2nd | 200 | TAT | 55Y | 4th |

Class 2: Amino acids 201–400

| Amino acid No.<br>201-300 | Codons | Codon No. •<br>Amino acid | Plane No.<br>in Figure 1 | Amino acid No.<br>301-400 | Codons | Codon No. •<br>Amino acid | Plane No.<br>in Figure 1 |
|---------------------------|--------|---------------------------|--------------------------|---------------------------|--------|---------------------------|--------------------------|
| 201                       | TTT    | 63F                       | 4th                      | 301                       | TGT    | 59C                       | 4th                      |
| 202                       | AAA    | 21K                       | 2nd                      | 302                       | ACG    | 33T                       | 3rd                      |
| 203                       | ATA    | 29I                       | 2nd                      | 303                       | TTG    | 47L                       | 3rd                      |
| 204                       | TAT    | 55Y                       | 4th                      | 304                       | AAA    | 21K                       | 2nd                      |
| 205                       | TCT    | 51S                       | 4th                      | 305                       | TCC    | 3S                        | 1st                      |
| 206                       | AAG    | 37K                       | 3rd                      | 306                       | TTC    | 15F                       | 1st                      |
| 207                       | CAC    | 4H                        | 1st                      | 307                       | ACT    | 49T                       | 4th                      |
| 208                       | ACG    | 33T                       | 3rd                      | 308                       | GTA    | 30V                       | 2nd                      |

|     |     |     |     |     |     |     |     |
|-----|-----|-----|-----|-----|-----|-----|-----|
| 209 | CCT | 48P | 4th | 309 | GAA | 22E | 2nd |
| 210 | ATT | 61I | 4th | 310 | AAA | 21K | 2nd |
| 211 | AAT | 53N | 4th | 311 | GGA | 26G | 2nd |
| 212 | TTA | 31L | 2nd | 312 | ATC | 13I | 1st |
| 213 | GTG | 46V | 4th | 313 | TAT | 55Y | 4th |
| 214 | CGT | 56R | 4th | 314 | CAA | 20Q | 2nd |
| 215 | GAT | 54D | 4th | 315 | ACT | 49T | 4th |
| 216 | CTC | 12L | 1st | 316 | TCT | 51S | 4th |
| 217 | CCT | 48P | 4th | 317 | AAC | 5N  | 1st |
| 218 | CAG | 36Q | 3rd | 318 | TTT | 63F | 4th |
| 219 | GGT | 58G | 4th | 319 | AGA | 25R | 2nd |
| 220 | TTT | 63F | 4th | 320 | GTC | 14V | 1st |
| 221 | TCG | 35S | 3rd | 321 | CAA | 20Q | 2nd |
| 222 | GCT | 50A | 4th | 322 | CCA | 16P | 2nd |
| 223 | TTA | 31L | 2nd | 323 | ACA | 17T | 2nd |
| 224 | GAA | 22E | 2nd | 324 | GAA | 22E | 2nd |
| 225 | CCA | 16P | 2nd | 325 | TCT | 51S | 4th |
| 226 | TTG | 47L | 3rd | 326 | ATT | 61I | 4th |
| 227 | GTA | 30V | 2nd | 327 | GTT | 62V | 4th |
| 228 | GAT | 54D | 4th | 328 | AGA | 25R | 2nd |
| 229 | TTG | 47L | 3rd | 329 | TTT | 63F | 4th |
| 230 | CCA | 16P | 2nd | 330 | CCT | 48P | 4th |
| 231 | ATA | 29I | 2nd | 331 | AAT | 53N | 4th |
| 232 | GGT | 58G | 4th | 332 | ATT | 61I | 4th |
| 233 | ATT | 61I | 4th | 333 | ACA | 17T | 2nd |
| 234 | AAC | 5N  | 1st | 334 | AAC | 5N  | 1st |
| 235 | ATC | 13I | 1st | 335 | TTG | 47L | 4th |
| 236 | ACT | 49T | 4th | 336 | TGC | 11C | 1st |
| 237 | AGG | 41R | 3rd | 337 | CCT | 48P | 4th |
| 238 | TTT | 63F | 4th | 338 | TTT | 63F | 4th |
| 239 | CAA | 20Q | 2nd | 339 | GGT | 58G | 4th |
| 240 | ACT | 49T | 4th | 340 | GAA | 22E | 2nd |
| 241 | TTA | 31L | 2nd | 341 | GTT | 62V | 4th |
| 242 | CTT | 60L | 4th | 342 | TTT | 63F | 4th |
| 243 | GCT | 50A | 4th | 343 | AAC | 5N  | 1st |
| 244 | TTA | 31L | 2nd | 344 | GCC | 2A  | 1st |
| 245 | CAT | 52H | 4th | 345 | ACC | 1T  | 1st |
| 246 | AGA | 25R | 2nd | 346 | AGA | 25R | 2nd |
| 247 | AGT | 57S | 4th | 347 | TTT | 63F | 4th |
| 248 | TAT | 55Y | 4th | 348 | GCA | 18A | 2nd |
| 249 | TTG | 47L | 3rd | 349 | TCT | 51S | 4th |
| 250 | ACT | 49T | 4th | 350 | GTT | 62V | 4th |

|     |     |     |     |     |     |     |     |
|-----|-----|-----|-----|-----|-----|-----|-----|
| 251 | CCT | 48P | 4th | 351 | TAT | 55Y | 4th |
| 252 | GGT | 58G | 4th | 352 | GCT | 50A | 4th |
| 253 | GAT | 54D | 4th | 353 | TGG | 43W | 3rd |
| 254 | TCT | 51S | 4th | 354 | AAC | 5N  | 1st |
| 255 | TCT | 51S | 4th | 355 | AGG | 41R | 3rd |
| 256 | TCA | 19S | 2nd | 356 | AAG | 37K | 3rd |
| 257 | GGT | 58G | 4th | 357 | AGA | 25R | 2nd |
| 258 | TGG | 43W | 3rd | 358 | ATC | 13I | 1st |
| 259 | ACA | 17T | 2nd | 359 | AGC | 9S  | 1st |
| 260 | GCT | 50A | 4th | 360 | AAC | 5N  | 1st |
| 261 | GGT | 58G | 4th | 361 | TGT | 59C | 4th |
| 262 | GCT | 50A | 4th | 362 | GTT | 62V | 4th |
| 263 | GCA | 18A | 2nd | 363 | GCT | 50A | 4th |
| 264 | GCT | 50A | 4th | 364 | GAT | 54D | 4th |
| 265 | TAT | 55Y | 4th | 365 | TAT | 55Y | 4th |
| 266 | TAT | 55Y | 4th | 366 | TCT | 51S | 4th |
| 267 | GTG | 46V | 3rd | 367 | GTC | 14V | 1st |
| 268 | GGT | 58G | 4th | 368 | CTA | 28L | 2nd |
| 269 | TAT | 55Y | 4th | 369 | TAT | 55Y | 4th |
| 270 | CTT | 60L | 4th | 370 | AAT | 53N | 4th |
| 271 | CAA | 20Q | 2nd | 371 | TCC | 3S  | 1st |
| 272 | CTT | 48P | 4th | 372 | GCA | 18A | 2nd |
| 273 | AGG | 41R | 3rd | 373 | TCA | 19S | 2nd |
| 274 | ACT | 49T | 4th | 374 | TTT | 63F | 4th |
| 275 | TTT | 63F | 4th | 375 | TCC | 3S  | 1st |
| 276 | CTA | 28L | 2nd | 376 | ACT | 49T | 4th |
| 277 | TTA | 31L | 2nd | 377 | TTT | 63F | 4th |
| 278 | AAA | 21K | 2nd | 378 | AAG | 37K | 3rd |
| 279 | TAT | 55Y | 4th | 379 | TGT | 59C | 4th |
| 280 | AAT | 53N | 4th | 380 | TAT | 55Y | 4th |
| 281 | GAA | 22E | 2nd | 381 | GGA | 26G | 2nd |
| 282 | AAT | 53N | 4th | 382 | GTG | 46V | 3rd |
| 283 | GGA | 26G | 2nd | 383 | TCT | 51S | 4th |
| 284 | ACC | 1T  | 1st | 384 | CCT | 48P | 4th |
| 285 | ATT | 61I | 4th | 385 | ACT | 49T | 4th |
| 286 | ACA | 17T | 2nd | 386 | AAA | 21K | 2nd |
| 287 | GAT | 54D | 4th | 387 | TTA | 31L | 2nd |
| 288 | GCT | 50A | 4th | 388 | AAT | 53N | 4th |
| 289 | GTA | 30V | 2nd | 389 | GAT | 54D | 4th |
| 290 | GAC | 6D  | 1st | 390 | CTC | 12L | 1st |
| 291 | TGT | 59C | 4th | 391 | TGC | 11C | 1st |
| 292 | GCA | 18A | 2nd | 392 | TTT | 63F | 4th |

|     |     |     |     |     |     |     |     |
|-----|-----|-----|-----|-----|-----|-----|-----|
| 293 | CTT | 60L | 4th | 393 | ACT | 49T | 4th |
| 294 | GAC | 6D  | 1st | 394 | AAT | 53N | 4th |
| 295 | CCT | 48P | 4th | 395 | GTC | 14V | 1st |
| 296 | CTC | 12L | 1st | 396 | TAT | 55Y | 4th |
| 297 | TCA | 19S | 2nd | 397 | GCA | 18A | 2nd |
| 298 | GAA | 22E | 2nd | 398 | GAT | 54D | 4th |
| 299 | ACA | 17T | 2nd | 399 | TCA | 19S | 2nd |
| 300 | AAG | 37K | 3rd | 400 | TTT | 63F | 4th |

Class 3: Amino acids 401–600

| Amino acid No.<br>401-500 | Codons | Codon No. •<br>Amino acid | Plane No.<br>in Figure 1 | Amino acid No.<br>501-600 | Codons | Codon No. •<br>Amino acid | Plane No.<br>in Figure 1 |
|---------------------------|--------|---------------------------|--------------------------|---------------------------|--------|---------------------------|--------------------------|
| 401                       | GTA    | 30V                       | 3rd                      | 501                       | AAT    | 53N                       | 4th                      |
| 402                       | ATT    | 61I                       | 4th                      | 502                       | GGT    | 58G                       | 4th                      |
| 403                       | AGA    | 25R                       | 2nd                      | 503                       | GTT    | 62V                       | 4th                      |
| 404                       | GGT    | 58G                       | 4th                      | 504                       | GGT    | 58G                       | 4th                      |
| 405                       | GAT    | 54D                       | 4th                      | 505                       | TAC    | 7Y                        | 1st                      |
| 406                       | GAA    | 22E                       | 2nd                      | 506                       | CAA    | 20Q                       | 2nd                      |
| 407                       | GTC    | 14V                       | 1st                      | 507                       | CCA    | 16P                       | 2nd                      |
| 408                       | AGA    | 25R                       | 2nd                      | 508                       | TAC    | 7Y                        | 1st                      |
| 409                       | CAA    | 20Q                       | 2nd                      | 509                       | AGA    | 25R                       | 2nd                      |
| 410                       | ATC    | 13I                       | 1st                      | 510                       | GTA    | 30V                       | 2nd                      |
| 411                       | GCT    | 50A                       | 4th                      | 511                       | GTA    | 30V                       | 2nd                      |
| 412                       | CCA    | 16P                       | 2nd                      | 512                       | GTA    | 30V                       | 2nd                      |
| 413                       | GGG    | 42G                       | 3rd                      | 513                       | CTT    | 60L                       | 4th                      |
| 414                       | CAA    | 20Q                       | 2nd                      | 514                       | TCT    | 51S                       | 4th                      |
| 415                       | ACT    | 49T                       | 4th                      | 515                       | TTT    | 63F                       | 4th                      |
| 416                       | GGA    | 26G                       | 2nd                      | 516                       | GAA    | 22E                       | 2nd                      |
| 417                       | AAG    | 37K                       | 3rd                      | 517                       | CTT    | 60L                       | 4th                      |
| 418                       | ATT    | 61I                       | 4th                      | 518                       | CTA    | 28L                       | 2nd                      |
| 419                       | GCT    | 50A                       | 4th                      | 519                       | CAT    | 52H                       | 4th                      |
| 420                       | GAT    | 54D                       | 4th                      | 520                       | GCA    | 18A                       | 2nd                      |
| 421                       | TAT    | 55Y                       | 4th                      | 521                       | CCA    | 16P                       | 2nd                      |
| 422                       | AAT    | 53N                       | 4th                      | 522                       | GCA    | 18A                       | 2nd                      |
| 423                       | TAT    | 55Y                       | 4th                      | 523                       | ACT    | 49T                       | 4th                      |
| 424                       | AAA    | 21K                       | 2nd                      | 524                       | GTT    | 62V                       | 4th                      |
| 425                       | TTA    | 31L                       | 2nd                      | 525                       | TGT    | 59C                       | 4th                      |
| 426                       | CCA    | 16P                       | 2nd                      | 526                       | GGA    | 26G                       | 2nd                      |
| 427                       | GAT    | 54D                       | 4th                      | 527                       | CCT    | 48P                       | 4th                      |

|     |     |     |     |     |     |     |     |
|-----|-----|-----|-----|-----|-----|-----|-----|
| 428 | GAT | 54D | 4th | 528 | AAA | 21K | 2nd |
| 429 | TTT | 63F | 4th | 529 | AAG | 37K | 3rd |
| 430 | ACA | 17T | 2nd | 530 | TCT | 51S | 4th |
| 431 | GGC | 10G | 1st | 531 | ACT | 49T | 4th |
| 432 | TGC | 11C | 1st | 532 | AAT | 53N | 4th |
| 433 | GTT | 62V | 4th | 533 | TTG | 47L | 3rd |
| 434 | ATA | 29I | 2nd | 534 | GTT | 62V | 4th |
| 435 | GCT | 50A | 4th | 535 | AAA | 21K | 2nd |
| 436 | TGG | 43W | 3rd | 536 | AAC | 5N  | 1st |
| 437 | AAT | 53N | 4th | 537 | AAA | 21K | 2nd |
| 438 | TCT | 51S | 4th | 538 | TGT | 59C | 4th |
| 439 | AAC | 5N  | 1st | 539 | GTC | 14V | 1st |
| 440 | AAT | 53N | 4th | 540 | AAT | 53N | 4th |
| 441 | CTT | 60L | 4th | 541 | TTC | 15F | 1st |
| 442 | GAT | 54D | 4th | 542 | AAC | 5N  | 1st |
| 443 | TCT | 51S | 4th | 543 | TTC | 15F | 1st |
| 444 | AAG | 37K | 3rd | 544 | AAT | 53N | 4th |
| 445 | GTT | 62V | 4th | 545 | GGT | 58G | 4th |
| 446 | GGT | 58G | 4th | 546 | TTA | 31L | 2nd |
| 447 | GGT | 58G | 4th | 547 | ACA | 17T | 2nd |
| 448 | AAT | 53N | 4th | 548 | GGC | 10G | 1st |
| 449 | TAT | 55Y | 4th | 549 | ACA | 17T | 2nd |
| 450 | AAT | 53N | 4th | 550 | GGT | 58G | 4th |
| 451 | TAC | 7Y  | 1st | 551 | GTT | 62V | 4th |
| 452 | CTG | 44L | 3rd | 552 | CTT | 60L | 4th |
| 453 | TAT | 55Y | 4th | 553 | ACT | 49T | 4th |
| 454 | AGA | 25R | 2nd | 554 | GAG | 38E | 3rd |
| 455 | TTG | 47L | 3rd | 555 | TCT | 51S | 4th |
| 456 | TTT | 63F | 4th | 556 | AAC | 5N  | 1st |
| 457 | AGG | 41R | 3rd | 557 | AAA | 21K | 2nd |
| 458 | AAG | 37K | 3rd | 558 | AAG | 37K | 3rd |
| 459 | TCT | 51S | 4th | 559 | TTT | 63F | 4th |
| 460 | AAT | 53N | 4th | 560 | CTG | 44L | 3rd |
| 461 | CTC | 12L | 1st | 561 | CCT | 48P | 4th |
| 462 | AAA | 21K | 2nd | 562 | TTC | 15F | 1st |
| 463 | CCT | 48P | 4th | 563 | CAA | 20Q | 2nd |
| 464 | TTT | 63F | 4th | 564 | CAA | 20Q | 2nd |
| 465 | GAG | 38E | 3rd | 565 | TTT | 63F | 4th |
| 466 | AGA | 25R | 2nd | 566 | GGC | 10G | 1st |
| 467 | GAT | 54D | 4th | 567 | AGA | 25R | 2nd |
| 468 | ATT | 61I | 4th | 568 | GAC | 6D  | 1st |
| 469 | TCA | 19S | 2nd | 569 | ATT | 61I | 4th |

|     |     |     |     |     |     |     |     |
|-----|-----|-----|-----|-----|-----|-----|-----|
| 470 | ACT | 49T | 4th | 570 | GCT | 50A | 4th |
| 471 | GAA | 22E | 2nd | 571 | GAC | 6D  | 1st |
| 472 | ATC | 13I | 1st | 572 | ACT | 49T | 4th |
| 473 | TAT | 55Y | 4th | 573 | ACT | 49T | 4th |
| 474 | CAG | 36Q | 3rd | 574 | GAT | 54D | 4th |
| 475 | GCC | 2A  | 1st | 575 | GCT | 50A | 4th |
| 476 | GGT | 58G | 4th | 576 | GTC | 14V | 1st |
| 477 | AGC | 9S  | 1st | 577 | CGT | 56R | 4th |
| 478 | ACA | 17T | 2nd | 578 | GAT | 54D | 4th |
| 479 | CCT | 48P | 4th | 579 | CCA | 16P | 2nd |
| 480 | TGT | 59C | 4th | 580 | CAG | 36Q | 3rd |
| 481 | AAT | 53N | 4th | 581 | ACA | 17T | 2nd |
| 482 | GGT | 58G | 4th | 582 | CTT | 60L | 4th |
| 483 | GTT | 62V | 4th | 583 | GAG | 38E | 3rd |
| 484 | GAA | 22E | 2nd | 584 | ATT | 61I | 4th |
| 485 | GGT | 58G | 4th | 585 | CTT | 60L | 4th |
| 486 | TTT | 63F | 4th | 586 | GAC | 6D  | 1st |
| 487 | AAT | 53N | 4th | 587 | ATT | 61I | 4th |
| 488 | TGT | 59C | 4th | 588 | ACA | 17T | 2nd |
| 489 | TAC | 7Y  | 1st | 589 | CCA | 16P | 2nd |
| 490 | TTT | 63F | 4th | 590 | TGT | 59C | 4th |
| 491 | CCT | 48P | 4th | 591 | TCT | 51S | 4th |
| 492 | TTA | 31L | 2nd | 592 | TTT | 63F | 4th |
| 493 | CAA | 20Q | 2nd | 593 | GGT | 58G | 4th |
| 494 | TCA | 19S | 2nd | 594 | GGT | 58G | 4th |
| 495 | TAT | 55Y | 4th | 595 | GTC | 14V | 1st |
| 496 | GGT | 58G | 4th | 596 | AGT | 57S | 4th |
| 497 | TTC | 15F | 1st | 597 | GTT | 62V | 4th |
| 498 | CAA | 20Q | 2nd | 598 | ATA | 29I | 2nd |
| 499 | CCC | 0P  | 1st | 599 | ACA | 17T | 2nd |
| 500 | ACT | 49T | 4th | 600 | CCA | 16P | 2nd |

Class 4: Amino acids 601–800

| Amino acid No.<br>601-700 | Codons | Codon No. •<br>Amino acid | Plane No.<br>in Figure 1 | Amino acid No.<br>701-800 | Codons | Codon No. •<br>Amino acid | Plane No.<br>in Figure 1 |
|---------------------------|--------|---------------------------|--------------------------|---------------------------|--------|---------------------------|--------------------------|
| 601                       | GGA    | 26G                       | 2nd                      | 701                       | GCA    | 18A                       | 2nd                      |
| 602                       | ACA    | 17T                       | 2nd                      | 702                       | GAA    | 22E                       | 2nd                      |
| 603                       | AAT    | 53N                       | 4th                      | 703                       | AAT    | 53N                       | 4th                      |
| 604                       | ACT    | 49T                       | 4th                      | 704                       | TCA    | 19S                       | 2nd                      |



|     |     |     |     |     |     |     |     |
|-----|-----|-----|-----|-----|-----|-----|-----|
| 605 | TCT | 51S | 4th | 705 | GTT | 62V | 4th |
| 606 | AAC | 5N  | 1st | 706 | GCT | 50A | 4th |
| 607 | CAG | 36Q | 3rd | 707 | TAC | 7Y  | 1st |
| 608 | GTT | 62V | 4th | 708 | TCT | 51S | 4th |
| 609 | GCT | 50A | 4th | 709 | AAT | 53N | 4th |
| 610 | GTT | 62V | 4th | 710 | AAC | 5N  | 1st |
| 611 | CTT | 60L | 4th | 711 | TCT | 51S | 4th |
| 612 | TAT | 55Y | 4th | 712 | ATT | 61I | 4th |
| 613 | CAG | 36Q | 3rd | 713 | GCC | 2A  | 1st |
| 614 | GAT | 54D | 4th | 714 | ATA | 29I | 2nd |
| 615 | GTT | 62V | 4th | 715 | CCC | 0P  | 1st |
| 616 | AAC | 5N  | 1st | 716 | ACA | 17T | 2nd |
| 617 | TGC | 11C | 1st | 717 | AAT | 53N | 4th |
| 618 | ACA | 17T | 2nd | 718 | TTT | 63F | 4th |
| 619 | GAA | 22E | 2nd | 719 | ACT | 49T | 4th |
| 620 | GTC | 14V | 1st | 720 | ATT | 61I | 4th |
| 621 | CCT | 48P | 4th | 721 | AGT | 57S | 4th |
| 622 | GTT | 62V | 4th | 722 | GTT | 62V | 4th |
| 623 | GCT | 50A | 4th | 723 | ACC | 1T  | 1st |
| 624 | ATT | 61I | 4th | 724 | ACA | 17T | 2nd |
| 625 | CAT | 52H | 4th | 725 | GAA | 22E | 2nd |
| 626 | GCA | 18A | 2nd | 726 | ATT | 61I | 4th |
| 627 | GAT | 54D | 4th | 727 | CTA | 28L | 2nd |
| 628 | CAA | 20Q | 2nd | 728 | CCA | 16P | 2nd |
| 629 | CTT | 60L | 4th | 729 | GTG | 46V | 3rd |
| 630 | ACT | 49T | 4th | 730 | TCT | 51S | 4th |
| 631 | CCT | 48P | 4th | 731 | ATG | 45M | 3rd |
| 632 | ACT | 49T | 4th | 732 | ACC | 1T  | 1st |
| 633 | TGG | 43W | 3rd | 733 | AAG | 37K | 3rd |
| 634 | CGT | 56R | 4th | 734 | ACA | 17T | 2nd |
| 635 | GTT | 62V | 4th | 735 | TCA | 19S | 2nd |
| 636 | TAT | 55Y | 4th | 736 | GTA | 30V | 2nd |
| 637 | TCT | 51S | 4th | 737 | GAT | 54D | 4th |
| 638 | ACA | 17T | 2nd | 738 | TGT | 59C | 4th |
| 639 | GGT | 58G | 4th | 739 | ACA | 17T | 2nd |
| 640 | TCT | 51S | 4th | 740 | ATG | 45M | 3rd |
| 641 | AAT | 53N | 4th | 741 | TAC | 7Y  | 1st |
| 642 | GTT | 62V | 4th | 742 | ATT | 61I | 4th |
| 643 | TTT | 63F | 4th | 743 | TGT | 59C | 4th |
| 644 | CAA | 20Q | 2nd | 744 | GGT | 58G | 4th |
| 645 | ACA | 17T | 2nd | 745 | GAT | 54D | 4th |
| 646 | CGT | 56R | 4th | 746 | TCA | 19S | 2nd |

|     |     |     |     |     |     |     |     |
|-----|-----|-----|-----|-----|-----|-----|-----|
| 647 | GCA | 18A | 2nd | 747 | ACT | 49T | 4th |
| 648 | GGC | 10G | 1st | 748 | GAA | 22E | 2nd |
| 649 | TGT | 59C | 4th | 749 | TGC | 11C | 1st |
| 650 | TTA | 31L | 2nd | 750 | AGC | 9S  | 1st |
| 651 | ATA | 29I | 2nd | 751 | AAT | 53N | 4th |
| 652 | GGG | 42G | 3rd | 752 | CTT | 60L | 4th |
| 653 | GCT | 50A | 4th | 753 | TTG | 47L | 3rd |
| 654 | GAA | 22E | 2nd | 754 | TTG | 47L | 3rd |
| 655 | CAT | 52H | 4th | 755 | CAA | 20Q | 2nd |
| 656 | GTC | 14V | 1st | 756 | TAT | 55Y | 4th |
| 657 | AAC | 5N  | 1st | 757 | GGC | 10G | 1st |
| 658 | AAC | 5N  | 1st | 758 | AGT | 57S | 4th |
| 659 | TCA | 19S | 2nd | 759 | TTT | 63F | 4th |
| 660 | TAT | 55Y | 4th | 760 | TGT | 59C | 4th |
| 661 | GAG | 38E | 3rd | 761 | ACA | 17T | 2nd |
| 662 | TGT | 59C | 4th | 762 | CAA | 20Q | 2nd |
| 663 | GAC | 6D  | 1st | 763 | TTA | 31L | 2nd |
| 664 | ATA | 29I | 2nd | 764 | AAC | 5N  | 1st |
| 665 | CCC | 0P  | 1st | 765 | CGT | 56R | 4th |
| 666 | ATT | 61I | 4th | 766 | GCT | 50A | 4th |
| 667 | GGT | 58G | 4th | 767 | TTA | 31L | 2nd |
| 668 | GCA | 18A | 2nd | 768 | ACT | 49T | 4th |
| 669 | GGT | 58G | 4th | 769 | GGA | 26G | 2nd |
| 670 | ATA | 29I | 2nd | 770 | ATA | 29I | 2nd |
| 671 | TGC | 11C | 1st | 771 | GCT | 50A | 4th |
| 672 | GCT | 50A | 4th | 772 | GTT | 62V | 4th |
| 673 | AGT | 57S | 4th | 773 | GAA | 22E | 2nd |
| 674 | TAT | 55Y | 4th | 774 | CAA | 20Q | 2nd |
| 675 | CAG | 36Q | 3rd | 775 | GAC | 6D  | 1st |
| 676 | ACT | 49T | 4th | 776 | AAA | 21K | 2nd |
| 677 | CAG | 36Q | 3rd | 777 | AAC | 5N  | 1st |
| 678 | ACT | 49T | 4th | 778 | ACC | 1T  | 1st |
| 679 | AAT | 53N | 4th | 779 | CAA | 20Q | 2nd |
| 680 | TCT | 51S | 4th | 780 | GAA | 22E | 2nd |
| 681 | CCT | 48P | 4th | 781 | GTT | 62V | 4th |
| 682 | CGG | 40R | 3rd | 782 | TTT | 63F | 4th |
| 683 | CGG | 40R | 3rd | 783 | GCA | 18A | 2nd |
| 684 | GCA | 18A | 2nd | 784 | CAA | 20Q | 2nd |
| 685 | CGT | 56R | 4th | 785 | GTC | 14V | 1st |
| 686 | AGT | 57S | 4th | 786 | AAA | 21K | 2nd |
| 687 | GTA | 30V | 2nd | 787 | CAA | 20Q | 2nd |
| 688 | GCT | 50A | 4th | 788 | ATT | 61I | 4th |

|     |     |     |     |     |     |     |     |
|-----|-----|-----|-----|-----|-----|-----|-----|
| 689 | AGT | 57S | 4th | 789 | TAC | 7Y  | 1st |
| 690 | CAA | 20Q | 2nd | 790 | AAA | 21K | 2nd |
| 691 | TCC | 3S  | 1st | 791 | ACA | 17T | 2nd |
| 692 | ATC | 13I | 1st | 792 | CCA | 16P | 2nd |
| 693 | ATT | 61I | 4th | 793 | CCA | 16P | 2nd |
| 694 | GCC | 2A  | 1st | 794 | ATT | 61I | 4th |
| 695 | TAC | 7Y  | 1st | 795 | AAA | 21K | 2nd |
| 696 | ACT | 49T | 4th | 796 | GAT | 54D | 4th |
| 697 | ATG | 45M | 3rd | 797 | TTT | 63F | 4th |
| 698 | TCA | 19S | 2nd | 798 | GGT | 58G | 4th |
| 699 | CTT | 60L | 4th | 799 | GGT | 58G | 4th |
| 700 | GGT | 58G | 4th | 800 | TTT | 63F | 4th |

Class 5: Amino acids 801–1000

| Amino acid No.<br>801-900 | Codons | Codon No. •<br>Amino acid | Plane No.<br>in Figure 1 | Amino acid No.<br>901-1000 | Codons | Codon No. •<br>Amino acid | Plane No.<br>in Figure 1 |
|---------------------------|--------|---------------------------|--------------------------|----------------------------|--------|---------------------------|--------------------------|
| 801                       | AAT    | 53N                       | 4th                      | 901                        | CAA    | 20Q                       | 2nd                      |
| 802                       | TTT    | 63F                       | 4th                      | 902                        | ATG    | 45M                       | 3rd                      |
| 803                       | TCA    | 19S                       | 2nd                      | 903                        | GCT    | 50A                       | 4th                      |
| 804                       | CAA    | 20Q                       | 2nd                      | 904                        | TAT    | 55Y                       | 4th                      |
| 805                       | ATA    | 29I                       | 2nd                      | 905                        | AGG    | 41R                       | 3rd                      |
| 806                       | TTA    | 31L                       | 2nd                      | 906                        | TTT    | 63F                       | 4th                      |
| 807                       | CCA    | 16P                       | 2nd                      | 907                        | AAT    | 53N                       | 4th                      |
| 808                       | GAT    | 54D                       | 4th                      | 908                        | GGT    | 58G                       | 4th                      |
| 809                       | CCA    | 16P                       | 2nd                      | 909                        | ATT    | 61I                       | 4th                      |
| 810                       | TCA    | 19S                       | 2nd                      | 910                        | GGA    | 26G                       | 2nd                      |
| 811                       | AAA    | 21K                       | 2nd                      | 911                        | GTT    | 62V                       | 4th                      |
| 812                       | CCA    | 16P                       | 2nd                      | 912                        | ACA    | 17T                       | 2nd                      |
| 813                       | AGC    | 9S                        | 1st                      | 913                        | CAG    | 36Q                       | 3rd                      |
| 814                       | AAG    | 37K                       | 3rd                      | 914                        | AAT    | 53N                       | 4th                      |
| 815                       | AGG    | 41R                       | 3rd                      | 915                        | GTT    | 62V                       | 4th                      |
| 816                       | TCA    | 19S                       | 2nd                      | 916                        | CTC    | 12L                       | 1st                      |
| 817                       | TTT    | 63F                       | 4th                      | 917                        | TAT    | 55Y                       | 4th                      |
| 818                       | ATT    | 61I                       | 4th                      | 918                        | GAG    | 38E                       | 3rd                      |
| 819                       | GAA    | 22E                       | 2nd                      | 919                        | AAC    | 5N                        | 1st                      |
| 820                       | GAT    | 54D                       | 4th                      | 920                        | CAA    | 20Q                       | 2nd                      |
| 821                       | CTA    | 28L                       | 2nd                      | 921                        | AAA    | 21K                       | 2nd                      |
| 822                       | CTT    | 60L                       | 4th                      | 922                        | TTG    | 47L                       | 3rd                      |
| 823                       | TTC    | 15F                       | 1st                      | 923                        | ATT    | 61I                       | 4th                      |

|     |     |     |     |     |     |     |     |
|-----|-----|-----|-----|-----|-----|-----|-----|
| 824 | AAC | 5N  | 1st | 924 | GCC | 2A  | 1st |
| 825 | AAA | 21K | 2nd | 925 | AAC | 5N  | 1st |
| 826 | GTG | 46V | 3rd | 926 | CAA | 20Q | 2nd |
| 827 | ACA | 17T | 2nd | 927 | TTT | 63F | 4th |
| 828 | CTT | 60L | 4th | 928 | AAT | 53N | 4th |
| 829 | GCA | 18A | 2nd | 929 | AGT | 57S | 4th |
| 830 | GAT | 54D | 4th | 930 | GCT | 50A | 4th |
| 831 | GCT | 50A | 4th | 931 | ATT | 61I | 4th |
| 832 | GGC | 10G | 1st | 932 | GGC | 10G | 1st |
| 833 | TTC | 15F | 1st | 933 | AAA | 21K | 2nd |
| 834 | ATC | 13I | 1st | 934 | ATT | 61I | 4th |
| 835 | AAA | 21K | 2nd | 935 | CAA | 20Q | 2nd |
| 836 | CAA | 20Q | 2nd | 936 | GAC | 6D  | 1st |
| 837 | TAT | 55Y | 4th | 937 | TCA | 19S | 2nd |
| 838 | GGT | 58G | 4th | 938 | CTT | 60L | 4th |
| 839 | GAT | 54D | 4th | 939 | TCT | 51S | 4th |
| 840 | TGC | 11C | 1st | 940 | TCC | 3S  | 1st |
| 841 | CTT | 60L | 4th | 941 | ACA | 17T | 2nd |
| 842 | GGT | 58G | 4th | 942 | GCA | 18A | 2nd |
| 843 | GAT | 54D | 4th | 943 | AGT | 57S | 4th |
| 844 | ATT | 61I | 4th | 944 | GCA | 18A | 2nd |
| 845 | GCT | 50A | 4th | 945 | CTT | 60L | 4th |
| 846 | GCT | 50A | 4th | 946 | GGA | 26G | 2nd |
| 847 | AGA | 25R | 2nd | 947 | AAA | 21K | 2nd |
| 848 | GAC | 6D  | 1st | 948 | CTT | 60L | 4th |
| 849 | CTC | 12L | 1st | 949 | CAA | 20Q | 2nd |
| 850 | ATT | 61I | 4th | 950 | GAT | 54D | 4th |
| 851 | TGT | 59C | 4th | 951 | GTG | 46V | 3rd |
| 852 | GCA | 18A | 2nd | 952 | GTC | 14V | 1st |
| 853 | CAA | 20Q | 2nd | 953 | AAC | 5N  | 1st |
| 854 | AAG | 37K | 3rd | 954 | CAA | 20Q | 2nd |
| 855 | TTT | 63F | 4th | 955 | AAT | 53N | 4th |
| 856 | AAC | 5N  | 1st | 956 | GCA | 18A | 2nd |
| 857 | GGC | 10G | 1st | 957 | CAA | 20Q | 2nd |
| 858 | CTT | 60L | 4th | 958 | GCT | 50A | 4th |
| 859 | ACT | 49T | 4th | 959 | TTA | 31L | 2nd |
| 860 | GTT | 62V | 4th | 960 | AAC | 5N  | 1st |
| 861 | TTG | 47L | 3rd | 961 | ACG | 33T | 3rd |
| 862 | CCA | 16P | 2nd | 962 | CTT | 60L | 4th |
| 863 | CCT | 48P | 4th | 963 | GTT | 62V | 4th |
| 864 | TTG | 47L | 3rd | 964 | AAA | 21K | 2nd |
| 865 | CTC | 12L | 1st | 965 | CAA | 20Q | 2nd |

|     |     |     |     |      |     |     |     |
|-----|-----|-----|-----|------|-----|-----|-----|
| 866 | ACA | 17T | 2nd | 966  | CTT | 60L | 4th |
| 867 | GAT | 54D | 4th | 967  | AGC | 9S  | 1st |
| 868 | GAA | 22E | 2nd | 968  | TCC | 3S  | 1st |
| 869 | ATG | 45M | 3rd | 969  | AAT | 53N | 4th |
| 870 | ATT | 61I | 4th | 970  | TTT | 63F | 4th |
| 871 | GCT | 50A | 4th | 971  | GGT | 58G | 4th |
| 872 | CAA | 20Q | 2nd | 972  | GCA | 18A | 2nd |
| 873 | TAC | 7Y  | 1st | 973  | ATT | 61I | 4th |
| 874 | ACT | 49T | 4th | 974  | TCA | 19S | 2nd |
| 875 | TCT | 51S | 4th | 975  | AGT | 57S | 4th |
| 876 | GCA | 18A | 2nd | 976  | GTT | 62V | 4th |
| 877 | CTG | 44L | 3rd | 977  | TTA | 31L | 2nd |
| 878 | TTA | 31L | 2nd | 978  | AAT | 53N | 4th |
| 879 | GCG | 34A | 3rd | 979  | GAT | 54D | 4th |
| 880 | GGT | 58G | 4th | 980  | ATC | 13I | 1st |
| 881 | ACA | 17T | 2nd | 981  | CTT | 60L | 4th |
| 882 | ATC | 13I | 1st | 982  | TCA | 19S | 2nd |
| 883 | ACT | 49T | 4th | 983  | CGT | 56R | 4th |
| 884 | TCT | 51S | 4th | 984  | CTT | 60L | 4th |
| 885 | GGT | 58G | 4th | 985  | GAC | 6D  | 1st |
| 886 | TGG | 43W | 3rd | 986  | AAA | 21K | 2nd |
| 887 | ACC | 1T  | 1st | 987  | GTT | 62V | 4th |
| 888 | TTT | 63F | 4th | 988  | GAG | 38E | 3rd |
| 889 | GGT | 58G | 4th | 989  | GCT | 50A | 4th |
| 890 | GCA | 18A | 2nd | 990  | GAA | 22E | 2nd |
| 891 | GGT | 58G | 4th | 991  | GTG | 46V | 3rd |
| 892 | GCT | 50A | 4th | 992  | CAA | 20Q | 2nd |
| 893 | GCA | 18A | 2nd | 993  | ATT | 61I | 4th |
| 894 | TTA | 31L | 2nd | 994  | GAT | 54D | 4th |
| 895 | CAA | 20Q | 2nd | 995  | AGG | 41R | 3rd |
| 896 | ATA | 29I | 2nd | 996  | TTG | 47L | 3rd |
| 897 | CCA | 16P | 2nd | 997  | ATC | 13I | 1st |
| 898 | TTT | 63F | 4th | 998  | ACA | 17T | 2nd |
| 899 | GCT | 50A | 4th | 999  | GGC | 10G | 1st |
| 900 | ATG | 45M | 3rd | 1000 | AGA | 25R | 2nd |

Class 6: Amino acids 1001–1200

| Amino acid No.<br>1001-1100 | Codons | Codon No. •<br>Amino acid | Plane No.<br>in Figure 1 | Amino acid No.<br>1101-1200 | Codons | Codon No. •<br>Amino acid | Plane No.<br>in Figure 1 |
|-----------------------------|--------|---------------------------|--------------------------|-----------------------------|--------|---------------------------|--------------------------|
|-----------------------------|--------|---------------------------|--------------------------|-----------------------------|--------|---------------------------|--------------------------|

|      |     |     |     |      |     |     |     |
|------|-----|-----|-----|------|-----|-----|-----|
| 1001 | CTT | 60L | 4th | 1101 | CAC | 4H  | 1st |
| 1002 | CAA | 20Q | 2nd | 1102 | TGG | 43W | 3rd |
| 1003 | AGT | 57S | 4th | 1103 | TTT | 63F | 4th |
| 1004 | TTG | 47L | 3rd | 1104 | GTA | 30V | 2nd |
| 1005 | CAG | 36Q | 3rd | 1105 | ACA | 17T | 2nd |
| 1006 | ACA | 17T | 2nd | 1106 | CAA | 20Q | 2nd |
| 1007 | TAT | 55Y | 4th | 1107 | AGG | 41R | 3rd |
| 1008 | GTG | 46V | 3rd | 1108 | AAT | 53N | 4th |
| 1009 | ACT | 49T | 4th | 1109 | TTT | 63F | 4th |
| 1010 | CAA | 20Q | 2nd | 1110 | TAT | 55Y | 4th |
| 1011 | CAA | 20Q | 2nd | 1111 | GAA | 22E | 2nd |
| 1012 | TTA | 31L | 2nd | 1112 | CCA | 16P | 2nd |
| 1013 | ATT | 61I | 4th | 1113 | CAA | 20Q | 2nd |
| 1014 | AGA | 25R | 2nd | 1114 | ATC | 13I | 1st |
| 1015 | GCT | 50A | 4th | 1115 | ATT | 61I | 4th |
| 1016 | GCA | 18A | 2nd | 1116 | ACT | 49T | 4th |
| 1017 | GAA | 22E | 2nd | 1117 | ACA | 17T | 2nd |
| 1018 | ATC | 13I | 1st | 1118 | GAC | 6D  | 1st |
| 1019 | AGA | 25R | 2nd | 1119 | AAC | 5N  | 1st |
| 1020 | GCT | 50A | 4th | 1120 | ACA | 17T | 2nd |
| 1021 | TCT | 51S | 4th | 1121 | TTT | 63F | 4th |
| 1022 | GCT | 50A | 4th | 1122 | GTG | 46V | 3rd |
| 1023 | AAT | 53N | 4th | 1123 | TCT | 51S | 4th |
| 1024 | CTT | 60L | 4th | 1124 | GGT | 58G | 4th |
| 1025 | GCT | 50A | 4th | 1125 | AAC | 5N  | 1st |
| 1026 | GCT | 50A | 4th | 1126 | TGT | 59C | 4th |
| 1027 | ACT | 49T | 4th | 1127 | GAT | 54D | 4th |
| 1028 | AAA | 21K | 2nd | 1128 | GTT | 62V | 4th |
| 1029 | ATG | 45M | 3rd | 1129 | GTA | 30V | 2nd |
| 1030 | TCA | 19S | 2nd | 1130 | ATA | 29I | 2nd |
| 1031 | GAG | 38E | 3rd | 1131 | GGA | 26G | 2nd |
| 1032 | TGT | 59C | 4th | 1132 | ATT | 61I | 4th |
| 1033 | GTA | 30V | 2nd | 1133 | GTC | 14V | 1st |
| 1034 | CTT | 60L | 4th | 1134 | AAC | 5N  | 1st |
| 1035 | GGA | 26G | 2nd | 1135 | AAC | 5N  | 1st |
| 1036 | CAA | 20Q | 2nd | 1136 | ACA | 17T | 2nd |
| 1037 | TCA | 19S | 2nd | 1137 | GTT | 62V | 4th |
| 1038 | AAA | 21K | 2nd | 1138 | TAT | 55Y | 4th |
| 1039 | AGA | 25R | 2nd | 1139 | GAT | 54D | 4th |
| 1040 | GTT | 62V | 4th | 1140 | CCT | 48P | 4th |
| 1041 | GAT | 54D | 4th | 1141 | TTG | 47L | 3rd |
| 1042 | TTT | 63F | 4th | 1142 | CAA | 20Q | 2nd |

|      |     |     |     |      |     |     |     |
|------|-----|-----|-----|------|-----|-----|-----|
| 1043 | TGT | 59C | 4th | 1143 | CCT | 48P | 4th |
| 1044 | GGA | 26G | 2nd | 1144 | GAA | 22E | 2nd |
| 1045 | AAG | 37K | 3rd | 1145 | TTA | 31L | 2nd |
| 1046 | GGC | 10G | 1st | 1146 | GAC | 6D  | 1st |
| 1047 | TAT | 55Y | 4th | 1147 | TCA | 19S | 2nd |
| 1048 | CAT | 52H | 4th | 1148 | TTC | 15F | 1st |
| 1049 | CTT | 60L | 4th | 1149 | AAG | 37K | 3rd |
| 1050 | ATG | 45M | 3rd | 1150 | GAG | 38E | 3rd |
| 1051 | TCC | 3S  | 1st | 1151 | GAG | 38E | 3rd |
| 1052 | TTC | 15F | 1st | 1152 | TTA | 31L | 2nd |
| 1053 | CCT | 48P | 4th | 1153 | GAT | 54D | 4th |
| 1054 | CAG | 36Q | 3rd | 1154 | AAA | 21K | 2nd |
| 1055 | TCA | 19S | 2nd | 1155 | TAT | 55Y | 4th |
| 1056 | GCA | 18A | 2nd | 1156 | TTT | 63F | 4th |
| 1057 | CCT | 48P | 4th | 1157 | AAG | 37K | 3rd |
| 1058 | CAT | 52H | 4th | 1158 | AAT | 53N | 4th |
| 1059 | GGT | 58G | 4th | 1159 | CAT | 52H | 4th |
| 1060 | GTA | 30V | 2nd | 1160 | ACA | 17T | 2nd |
| 1061 | GTC | 14V | 1st | 1161 | TCA | 19S | 2nd |
| 1062 | TTC | 15F | 1st | 1162 | CCA | 16P | 2nd |
| 1063 | TTG | 47L | 3rd | 1163 | GAT | 54D | 4th |
| 1064 | CAT | 52H | 4th | 1164 | GTT | 62V | 4th |
| 1065 | GTG | 46V | 3rd | 1165 | GAT | 54D | 4th |
| 1066 | ACT | 49T | 4th | 1166 | TTA | 31L | 2nd |
| 1067 | TAT | 55Y | 4th | 1167 | GGT | 58G | 4th |
| 1068 | GTC | 14V | 1st | 1168 | GAC | 6D  | 1st |
| 1069 | CCT | 48P | 4th | 1169 | ATC | 13I | 1st |
| 1070 | GCA | 18A | 2nd | 1170 | TCT | 51S | 4th |
| 1071 | CAA | 20Q | 2nd | 1171 | GGC | 10G | 1st |
| 1072 | GAA | 22E | 2nd | 1172 | ATT | 61I | 4th |
| 1073 | AAG | 37K | 3rd | 1173 | AAT | 53N | 4th |
| 1074 | AAC | 5N  | 1st | 1174 | GCT | 50A | 4th |
| 1075 | TTC | 15F | 1st | 1175 | TCA | 19S | 2nd |
| 1076 | ACA | 17T | 2nd | 1176 | GTT | 62V | 4th |
| 1077 | ACT | 49T | 4th | 1177 | GTA | 30V | 2nd |
| 1078 | GCT | 50A | 4th | 1178 | AAC | 5N  | 1st |
| 1079 | CCT | 48P | 4th | 1179 | ATT | 61I | 4th |
| 1080 | GCC | 2A  | 1st | 1180 | CAA | 20Q | 2nd |
| 1081 | ATT | 61I | 4th | 1181 | AAA | 21K | 2nd |
| 1082 | TGT | 59C | 4th | 1182 | GAA | 22E | 2nd |
| 1083 | CAT | 52H | 4th | 1183 | ATT | 61I | 4th |
| 1084 | GAT | 54D | 4th | 1184 | GAC | 6D  | 1st |

|      |     |     |     |      |     |     |     |
|------|-----|-----|-----|------|-----|-----|-----|
| 1085 | GGA | 26G | 2nd | 1185 | CGC | 8R  | 1st |
| 1086 | AAA | 21K | 2nd | 1186 | CTC | 12L | 1st |
| 1087 | GCA | 18A | 2nd | 1187 | AAT | 53N | 4th |
| 1088 | CAC | 4H  | 1st | 1188 | GAG | 38E | 3rd |
| 1089 | TTT | 63F | 4th | 1189 | GTT | 62V | 4th |
| 1090 | CCT | 48P | 4th | 1190 | GCC | 2A  | 1st |
| 1091 | CGT | 56R | 4th | 1191 | AAG | 37K | 3rd |
| 1092 | GAA | 22E | 2nd | 1192 | AAT | 53N | 4th |
| 1093 | GGT | 58G | 4th | 1193 | TTA | 31L | 2nd |
| 1094 | GTC | 14V | 1st | 1194 | AAT | 53N | 4th |
| 1095 | TTT | 63F | 4th | 1195 | GAA | 22E | 2nd |
| 1096 | GTT | 62V | 4th | 1196 | TCT | 51S | 4th |
| 1097 | TCA | 19S | 2nd | 1197 | CTC | 12L | 1st |
| 1098 | AAT | 53N | 4th | 1198 | ATC | 13I | 1st |
| 1099 | GGC | 10G | 1st | 1199 | GAT | 54D | 4th |
| 1100 | ACA | 17T | 2nd | 1200 | CTC | 12L | 1st |

Class 7: Amino acids 1201--1274

| Amino acid No. 1201-1274 | Codons | Codon No. • Amino acid | Plane No. in Figure 1 |
|--------------------------|--------|------------------------|-----------------------|
| 1201                     | CAA    | 20Q                    | 2nd                   |
| 1202                     | GAA    | 22E                    | 2nd                   |
| 1203                     | CTT    | 60L                    | 4th                   |
| 1204                     | GGA    | 26G                    | 2nd                   |
| 1205                     | AAG    | 37K                    | 3rd                   |
| 1206                     | TAT    | 55Y                    | 4th                   |
| 1207                     | GAG    | 38E                    | 3rd                   |
| 1208                     | CAG    | 36Q                    | 3rd                   |
| 1209                     | TAT    | 55Y                    | 4th                   |
| 1210                     | ATA    | 29I                    | 2nd                   |
| 1211                     | AAA    | 21K                    | 2nd                   |
| 1212                     | TGG    | 43W                    | 3rd                   |
| 1213                     | CCA    | 16P                    | 2nd                   |
| 1214                     | TGG    | 43W                    | 3rd                   |
| 1215                     | TAC    | 7Y                     | 1st                   |
| 1216                     | ATT    | 61I                    | 4th                   |
| 1217                     | TGG    | 43W                    | 3rd                   |
| 1218                     | CTA    | 28L                    | 2nd                   |
| 1219                     | GGT    | 58G                    | 4th                   |



|      |     |     |     |
|------|-----|-----|-----|
| 1220 | TTT | 63F | 4th |
| 1221 | ATA | 29I | 2nd |
| 1222 | GCT | 50A | 4th |
| 1223 | GGC | 10G | 1st |
| 1224 | TTG | 47L | 3rd |
| 1225 | ATT | 61I | 4th |
| 1226 | GCC | 2A  | 1st |
| 1227 | ATA | 29I | 2nd |
| 1228 | GTA | 30V | 2nd |
| 1229 | ATG | 45M | 3rd |
| 1230 | GTG | 46V | 3rd |
| 1231 | ACA | 17T | 2nd |
| 1232 | ATT | 61I | 4th |
| 1233 | ATG | 45M | 3rd |
| 1234 | CTT | 60L | 4th |
| 1235 | TGC | 11C | 1st |
| 1236 | TGT | 59C | 4th |
| 1237 | ATG | 45M | 3rd |
| 1238 | ACC | 1T  | 1st |
| 1239 | AGT | 57S | 4th |
| 1240 | TGC | 11C | 1st |
| 1241 | TGT | 59C | 4th |
| 1242 | AGT | 57S | 4th |
| 1243 | TGT | 59C | 4th |
| 1244 | CTC | 12L | 1st |
| 1245 | AAG | 37K | 3rd |
| 1246 | GGC | 10G | 1st |
| 1247 | TGT | 59C | 4th |
| 1248 | TGT | 59C | 4th |
| 1249 | TCT | 51S | 4th |
| 1250 | TGT | 59C | 4th |
| 1251 | GGA | 26G | 2nd |
| 1252 | TCC | 3S  | 1st |
| 1253 | TGC | 11C | 1st |
| 1254 | TGC | 11C | 1st |
| 1255 | AAA | 21K | 2nd |
| 1256 | TTT | 63F | 4th |
| 1257 | GAT | 54D | 4th |
| 1258 | GAA | 22E | 2nd |
| 1259 | GAC | 6D  | 1st |
| 1260 | GAC | 6D  | 1st |
| 1261 | TCT | 51S | 4th |

|      |     |        |     |
|------|-----|--------|-----|
| 1262 | GAG | 38E    | 3rd |
| 1263 | CCA | 16P    | 2nd |
| 1264 | GTG | 46V    | 3rd |
| 1265 | CTC | 12L    | 1st |
| 1266 | AAA | 21K    | 2nd |
| 1267 | GGA | 26G    | 2nd |
| 1268 | GTC | 14V    | 1st |
| 1269 | AAA | 21K    | 2nd |
| 1270 | TTA | 31L    | 2nd |
| 1271 | CAT | 52H    | 4th |
| 1272 | TAC | 7Y     | 1st |
| 1273 | ACA | 17T    | 2nd |
| 1274 | TAA | 23stop | 2nd |

Table S2: Full table of constituent-codon members of the same planes-linkage value in the 1st–4th planes of Figure 1.

| Plane No.<br>in Figure 1 | Linkage<br>number | Codon No.                            |                                      |                           |                           |                           |                           | Total<br>number |
|--------------------------|-------------------|--------------------------------------|--------------------------------------|---------------------------|---------------------------|---------------------------|---------------------------|-----------------|
| The<br>1st plane         | 3                 | 5, 2, 1                              | 13, 9, 5                             | 15, 5, 15                 | 14, 5, 5                  | 10, 15, 13                | 14, 5, 5                  | 8               |
|                          |                   | 6, 8, 12                             | 3, 11, 11                            |                           |                           |                           |                           |                 |
| The<br>2nd plane         | 5                 | 29, 17, 16,<br>26, 17                | 19, 20, 29,<br>31, 16                | 18, 31, 20,<br>29, 16     | 26, 20 19,<br>21, 25      |                           |                           | 4               |
|                          |                   |                                      |                                      |                           |                           |                           |                           |                 |
|                          | 4                 | 30, 22, 21,<br>26                    | 20, 16, 17,<br>22                    | 25, 30, 30,<br>30         | 21, 17, 16,<br>16         | 16, 19, 21,<br>16         |                           | 5               |
|                          |                   |                                      |                                      |                           |                           |                           |                           |                 |
|                          | 3                 | 29, 29, 25                           | 22, 26, 21                           | 31, 22, 16                | 28, 31, 21                | 19, 22, 17                | 21, 31, 16                | 18              |
|                          |                   | 31, 20, 19                           | 18, 16, 18                           | 17, 19, 30                | 17, 20, 31                | 20, 20, 31                | 18, 20, 22                |                 |
|                          |                   | 26, 21, 18                           | 30, 17, 20                           | 22, 16, 20                | 30, 29, 26                | 17, 19, 16                | 20, 21, 22                |                 |
| The<br>3rd plane         | 3                 | 37, 38, 38                           |                                      |                           |                           |                           |                           | 1               |
| The<br>4th plane         | 8                 | 63, 53, 54,<br>58, 62, 55,<br>63, 50 | 50, 51, 50,<br>53, 60, 50,<br>50, 49 |                           |                           |                           |                           | 2               |
|                          |                   |                                      |                                      |                           |                           |                           |                           |                 |
|                          | 7                 | 54, 63, 58,<br>58, 63, 53,<br>63     |                                      |                           |                           |                           |                           | 1               |
|                          |                   |                                      |                                      |                           |                           |                           |                           |                 |
|                          | 6                 | 50, 49, 53,<br>62, 62, 61            | 53, 61, 54,<br>58, 55, 63            | 49, 48, 58,<br>54, 51, 51 | 59, 62, 50,<br>54, 55, 51 | 61, 50, 54,<br>55, 53, 55 | 62, 58, 58,<br>53, 55, 53 | 8               |
|                          |                   | 53, 63, 49,<br>61, 57, 62            | 60, 58, 54,<br>61, 50, 50            |                           |                           |                           |                           |                 |
|                          | 5                 | 63, 62, 63,                          | 61, 63, 58,                          | 48, 59, 53,               | 49, 53, 58,               | 59, 51, 63,               | 62, 50, 62,               | 9               |

|  |   |                    |                    |                    |                |                |                |    |
|--|---|--------------------|--------------------|--------------------|----------------|----------------|----------------|----|
|  |   | 60, 62             | 49, 49             | 58, 62             | 62, 58         | 58, 58         | 60, 55         |    |
|  |   | 48, 62, 50, 51, 52 | 58, 51, 53, 62, 63 | 63, 53, 57, 50, 61 |                |                |                |    |
|  | 4 | 59, 62, 53, 60     | 56, 58, 62, 55     | 60, 61, 62, 53     | 63, 59, 53, 54 | 62, 55, 51, 57 | 63, 48, 53, 61 | 20 |
|  |   | 51, 62, 55, 50     | 53, 60, 54, 51     | 58, 63, 53, 59     | 58, 62, 60, 49 | 49, 49, 54, 50 | 60, 49, 48, 49 |    |
|  |   | 56, 62, 55, 51     | 49, 53, 51, 48     | 61, 59, 58, 54     | 63, 53, 58, 61 | 62, 54, 63, 59 | 61, 59, 52, 54 |    |
|  |   | 62, 55, 54, 48     | 59, 59, 51, 59     |                    |                |                |                |    |
|  | 3 | 49, 53, 51         | 53, 62, 49         | 53, 58, 49         | 58, 62, 55     | 48, 63, 60     | 48, 61, 53     | 33 |
|  |   | 50, 58, 50         | 50, 55, 55         | 58, 55, 60         | 51, 61, 62     | 48, 63, 58     | 51, 48, 49     |    |
|  |   | 63, 49, 53         | 54, 54, 63         | 60, 51, 63         | 49, 62, 59     | 51, 49, 53     | 53, 49, 51     |    |
|  |   | 50, 57, 55         | 57, 63, 59         | 55, 58, 54         | 60, 49, 62     | 49, 51, 58     | 53, 63, 58     |    |
|  |   | 55, 52, 60         | 48, 52, 58         | 49, 50, 48         | 63, 48, 56     | 53, 63, 55     | 59, 54, 62     |    |
|  |   | 54, 62, 54         | 61, 53, 50         | 59, 57, 59         |                |                |                |    |

Table S3: Full details of the aggregative population of the genetic code organization in the S-protein gene.

| S-protein code 1–1274   |        |   |   |   |   |   |   |   |            |                                                     |
|-------------------------|--------|---|---|---|---|---|---|---|------------|-----------------------------------------------------|
| Codon No•<br>Amino acid | Codons | ① | ② | ③ | ④ | ⑤ | ⑥ | ⑦ | Sum<br>①–⑦ | Amino acid replacements <sup>a</sup>                |
| 0P                      | CCC    | 1 | 0 | 1 | 2 | 0 | 0 | 0 | 4          | P25S                                                |
| 1T                      | ACC    | 3 | 2 | 0 | 3 | 1 | 0 | 1 | 10         | T723I, T732S, T732I, T778I                          |
| 2A                      | GCC    | 0 | 1 | 1 | 2 | 1 | 2 | 1 | 8          |                                                     |
| 3S                      | TCC    | 4 | 3 | 0 | 1 | 2 | 1 | 1 | 12         | S94F, S940F                                         |
| 4H                      | CAC    | 1 | 1 | 0 | 0 | 0 | 2 | 0 | 4          | H146Q, H1101Y                                       |
| 5N                      | AAC    | 5 | 6 | 4 | 7 | 6 | 6 | 0 | 34         |                                                     |
| 6D                      | GAC    | 3 | 2 | 3 | 2 | 3 | 4 | 2 | 19         | D178N, D936N, D936H, D1118Y, D1168G, D1259H, D1260Y |
| 7Y                      | TAC    | 3 | 0 | 4 | 4 | 1 | 0 | 2 | 14         |                                                     |
| 8R                      | CGC    | 0 | 0 | 0 | 0 | 0 | 1 | 0 | 1          |                                                     |
| 9S                      | AGC    | 0 | 1 | 1 | 1 | 2 | 0 | 0 | 5          | <b>S477R, S477I</b> , S813I                         |
| 10G                     | GGC    | 1 | 0 | 3 | 2 | 4 | 3 | 2 | 15         | G932S                                               |
| 11C                     | TGC    | 1 | 2 | 1 | 3 | 1 | 0 | 4 | 12         | C1235F                                              |
| 12L                     | CTC    | 0 | 3 | 1 | 0 | 3 | 3 | 2 | 12         | L216F                                               |
| 13I                     | ATC    | 0 | 3 | 2 | 1 | 4 | 4 | 0 | 14         |                                                     |
| 14V                     | GTC    | 5 | 3 | 4 | 3 | 1 | 4 | 1 | 21         | V70I, <b>V367F</b> , V1068F                         |

|                              |     |   |   |   |    |    |   |   |                           |                                                                             |
|------------------------------|-----|---|---|---|----|----|---|---|---------------------------|-----------------------------------------------------------------------------|
| 15F                          | TTC | 7 | 1 | 4 | 0  | 2  | 4 | 0 | 18                        |                                                                             |
| The 1st<br>plane<br>subtotal |     |   |   |   |    |    |   |   | 203 (16%:<br>203/1274)    |                                                                             |
| 16P                          | CCA | 3 | 3 | 7 | 3  | 5  | 2 | 2 | 25                        | P9L, P1162S, P1162R                                                         |
| 17T                          | ACA | 2 | 5 | 7 | 10 | 6  | 8 | 2 | 40                        | T19I, T33I, T299I, <b>T323I</b> ,<br>T547I, T716I, T791I, T1006I,<br>T1117I |
| 18A                          | GCA | 1 | 5 | 2 | 6  | 9  | 4 | 0 | 27                        | A27S, A27V, A522V, A647S,<br>A684V, A1070S                                  |
| 19S                          | TCA | 2 | 4 | 2 | 5  | 6  | 7 | 0 | 26                        | S698L, S704L, S982A                                                         |
| 20Q                          | CAA | 2 | 4 | 7 | 9  | 14 | 9 | 1 | 46                        | Q23H, Q957R                                                                 |
| 21K                          | AAA | 6 | 5 | 6 | 4  | 8  | 5 | 4 | 38                        |                                                                             |
| 22E                          | GAA | 5 | 6 | 4 | 7  | 3  | 7 | 2 | 34                        | E180V, E309Q, <b>E484K</b> ,<br>E654Q, E1202Q                               |
| 23Stop                       | TAA | 0 | 0 | 0 | 0  | 0  | 0 | 1 | 1                         |                                                                             |
| 24R                          | CGA | 0 | 0 | 0 | 0  | 0  | 0 | 0 | 0                         |                                                                             |
| 25R                          | AGA | 4 | 5 | 6 | 0  | 2  | 3 | 0 | 20                        | R102I, R102S, <b>R346K</b> ,<br><b>R357K</b>                                |
| 26G                          | GGA | 1 | 3 | 2 | 2  | 1  | 4 | 3 | 16                        |                                                                             |
| 27Stop                       | TGA | 0 | 0 | 0 | 0  | 0  | 0 | 0 | 0                         |                                                                             |
| 28L                          | CTA | 3 | 2 | 1 | 1  | 2  | 0 | 1 | 10                        |                                                                             |
| 29I                          | ATA | 3 | 2 | 2 | 5  | 2  | 1 | 3 | 18                        |                                                                             |
| 30V                          | GTA | 0 | 3 | 4 | 2  | 0  | 5 | 1 | 15                        | V687L, V1104L, V1177I                                                       |
| 31L                          | TTA | 5 | 6 | 3 | 3  | 5  | 5 | 1 | 28                        |                                                                             |
| The 2nd<br>plane<br>subtotal |     |   |   |   |    |    |   |   | 344<br>(27%:<br>344/1274) |                                                                             |
| 32P                          | CCG | 0 | 0 | 0 | 0  | 0  | 0 | 0 | 0                         |                                                                             |
| 33T                          | ACG | 0 | 2 | 0 | 0  | 1  | 0 | 0 | 3                         |                                                                             |
| 34A                          | GCG | 1 | 0 | 0 | 0  | 1  | 0 | 0 | 2                         | A879V                                                                       |
| 35S                          | TCG | 1 | 1 | 0 | 0  | 0  | 0 | 0 | 2                         | S221L                                                                       |
| 36Q                          | CAG | 5 | 1 | 2 | 4  | 1  | 2 | 1 | 16                        | Q14H, Q52R, Q173K, Q218H,<br>Q1208H                                         |
| 37K                          | AAG | 4 | 4 | 5 | 1  | 2  | 5 | 2 | 23                        | K558N, K1073T                                                               |
| 38E                          | GAG | 2 | 0 | 3 | 1  | 2  | 4 | 2 | 14                        | E96D                                                                        |
| 39Stop                       | TAG | 0 | 0 | 0 | 0  | 0  | 0 | 0 | 0                         |                                                                             |
| 40R                          | CGG | 0 | 0 | 0 | 2  | 0  | 0 | 0 | 2                         |                                                                             |
| 41R                          | AGG | 2 | 3 | 1 | 0  | 3  | 1 | 0 | 10                        | R190M                                                                       |
| 42G                          | GGG | 1 | 0 | 1 | 1  | 0  | 0 | 0 | 3                         |                                                                             |
| 43W                          | TGG | 3 | 2 | 1 | 1  | 1  | 1 | 3 | 12                        | W152R                                                                       |
| 44L                          | CTG | 0 | 0 | 2 | 0  | 1  | 0 | 0 | 3                         | <b>L452R</b>                                                                |

|                        |     |    |    |    |    |    |   |   |                           |                                                                                        |
|------------------------|-----|----|----|----|----|----|---|---|---------------------------|----------------------------------------------------------------------------------------|
| 45M                    | ATG | 3  | 0  | 0  | 3  | 3  | 2 | 3 | 14                        | M731I, M740V, M1237T                                                                   |
| 46V                    | GTG | 1  | 3  | 0  | 1  | 3  | 3 | 2 | 13                        | V213L, <b>V382L</b> , V1122L                                                           |
| 47L                    | TTG | 3  | 5  | 2  | 2  | 4  | 3 | 1 | 20                        | L141F, L1063F, L1224F                                                                  |
| The 3rd plane subtotal |     |    |    |    |    |    |   |   | 137<br>(11%:<br>137/1274) |                                                                                        |
| 48P                    | CCT | 5  | 8  | 5  | 3  | 1  | 7 | 0 | 29                        | P251S, <b>P330S</b> , <b>P384L</b> , <b>P384S</b> , <b>P479S</b> , P631S, P681H, P681L |
| 49T                    | ACT | 10 | 9  | 8  | 9  | 3  | 5 | 0 | 44                        | T51I, T76I, T76N, T95I, T240I, T676I, T678I, T719I, T747I, T1027I                      |
| 50A                    | GCT | 3  | 8  | 5  | 8  | 10 | 7 | 1 | 42                        | A67S, A243S, A575S, A672V, A706V, A771S, A846V, A892V, A899S, A1020V                   |
| 51S                    | TCT | 6  | 8  | 7  | 7  | 3  | 4 | 2 | 37                        | S71F, S884F                                                                            |
| 52H                    | CAT | 3  | 1  | 1  | 2  | 0  | 5 | 1 | 13                        | H69Y, H245Y                                                                            |
| 53N                    | AAT | 13 | 7  | 12 | 7  | 7  | 8 | 0 | 54                        | <b>N440K</b> , <b>N501Y</b>                                                            |
| 54D                    | GAT | 5  | 7  | 8  | 5  | 9  | 8 | 1 | 43                        | D80G, D111N, D198G, D253G, D574Y, D614G, D796Y, D796H, D839Y, D1084Y, D1153Y           |
| 55Y                    | TAT | 6  | 12 | 6  | 5  | 3  | 6 | 2 | 40                        | <b>Y453F</b>                                                                           |
| 56R                    | CGT | 1  | 1  | 1  | 4  | 1  | 1 | 0 | 9                         | R214L                                                                                  |
| 57S                    | AGT | 4  | 1  | 1  | 5  | 3  | 1 | 2 | 17                        | S689I, S929T                                                                           |
| 58G                    | GGT | 7  | 7  | 13 | 7  | 8  | 4 | 1 | 47                        | G142V, G184S, G252V, G257D, G261V, <b>G446V</b> , G639S, G1124V, G1167A, G1219V        |
| 59C                    | TGT | 3  | 4  | 5  | 5  | 1  | 4 | 6 | 28                        | C1243F                                                                                 |
| 60L                    | CTT | 6  | 3  | 6  | 4  | 11 | 4 | 2 | 36                        | L5F, L822F, L938F                                                                      |
| 61I                    | ATT | 4  | 5  | 6  | 9  | 10 | 7 | 3 | 44                        | I233V, I720V, I818V                                                                    |
| 62V                    | GTT | 13 | 4  | 8  | 10 | 6  | 7 | 0 | 48                        | V3G, V6A, V6F, V90F, V1040F                                                            |
| 63F                    | TTT | 14 | 13 | 9  | 6  | 8  | 7 | 2 | 59                        | <b>F490S</b> , F565L, F888L                                                            |
| The 4th plane subtotal |     |    |    |    |    |    |   |   | 590<br>(46%:<br>590/1274) |                                                                                        |

<sup>a</sup>Full details of 154 amino acid replacements in the S-protein of the first 2000 of 46,251 variants extracted from the CoV-GLUE, Amino acid variation database. Variants listed in boldface indicate amino acid replacements in the receptor-binding domain of the S-protein.

Table S4: Full details of the 154 amino acid replacements in the S-protein in the first 2000 of 46,251 variants in Table 4.

| Codon<br>No• Amino<br>acid | Amino acid replacements <sup>a</sup> |                          | Replacement-<br>related plane No.<br>in Figure 1 |
|----------------------------|--------------------------------------|--------------------------|--------------------------------------------------|
| 0P                         | P25S                                 | CCC 0 → 3 TCC            | 1st→1st                                          |
| 1T                         | T732S                                | ACC 1 → 3 TCC            |                                                  |
|                            | T723I                                | ACC 1 → 13 ATC           |                                                  |
|                            | T732I                                |                          |                                                  |
|                            | T778I                                |                          |                                                  |
| 2A                         | non                                  |                          |                                                  |
| 3S                         | S94F                                 | TCC 3 → 15 TTC           | 1st→1st                                          |
|                            | S940F                                |                          |                                                  |
| 4H                         | H146Q                                | CAC 4 →20 CAA,<br>36 CAG | 1st →2nd, 3rd                                    |
|                            | H1101Y                               | CAC 4 → 7 TAC            | 1st→1st                                          |
| 5N                         | non                                  |                          |                                                  |
| 6D                         | D936H                                | GAC 6 → 4 CAC            | 1st→1st                                          |
|                            | D1259H                               |                          |                                                  |
|                            | D178N                                | GAC 6 → 5 AAC            |                                                  |
|                            | D936N                                |                          |                                                  |
|                            | D1118Y                               | GAC 6 → 7 TAC            |                                                  |
|                            | D1260Y                               |                          |                                                  |
|                            | D1168G                               | GAC 6 → 10 GGC           |                                                  |
| 7Y                         | non                                  |                          |                                                  |
| 8R                         | non                                  |                          |                                                  |
| 9S                         | <b>S477R</b>                         | AGC 9 → 8 CGC            | 1st→1st                                          |
|                            | <b>S477I</b>                         | AGC 9 → 13 ATC           |                                                  |
|                            | S813I                                |                          |                                                  |
| 10G                        | G932S                                | GGC 10 → 9 AGC           |                                                  |
| 11C                        | C1235F                               | TGC 11 →15 TTC           |                                                  |
|                            | C1253F                               |                          |                                                  |
| 12L                        | L216F                                | CTC 12 →15 TTC           |                                                  |
| 13I                        | non                                  |                          |                                                  |
| 14V                        | V70I                                 | GTC 14 →13 ATC           | 1st→1st                                          |
|                            | <b>V367F</b>                         | GTC 14 →15 TTC           |                                                  |
|                            | V1068F                               |                          |                                                  |
| 15F                        | non                                  |                          |                                                  |
| 16P                        | P1162S                               | CCA 16 →19 TCA           | 2nd→2nd                                          |
|                            | P1162R                               | CCA 16 →24 CGA           |                                                  |
|                            | P9L                                  | CCA 16 →28 CTA           |                                                  |

|        |              |                       |              |
|--------|--------------|-----------------------|--------------|
| 17T    | T33I         | ACA 17 →29 ATA        |              |
|        | T19I         |                       |              |
|        | T299I        |                       |              |
|        | <b>T323I</b> |                       |              |
|        | T547I        |                       |              |
|        | T716I        |                       |              |
|        | T791I        |                       |              |
|        | T1006I       |                       |              |
|        | T1117I       |                       |              |
| 18A    | A27S         | GCA 18 →19 TCA        |              |
|        | A647S        |                       |              |
|        | A1070S       |                       |              |
|        | A27V         | GCA 18 →30 GTA        |              |
|        | <b>A522V</b> |                       |              |
|        | A684V        |                       |              |
| 19S    | S982A        | TCA 19 →18 GCA        |              |
|        | S698L        | TCA 19 →31 TTA        |              |
|        | S704L        |                       |              |
| 20Q    | Q23H         | CAA 20 →4 CAC, 52CAT  | 2nd→1st, 4th |
|        | Q957R        | CAA 20 →24 CGA        | 2nd→2nd      |
| 21K    | non          |                       |              |
| 22E    | E309Q        | GAA 22→20 CAA         | 2nd→2nd      |
|        | E654Q        |                       |              |
|        | E1202Q       |                       |              |
|        | E180V        | GAA 22 →30 GTA        |              |
| 23stop |              |                       |              |
| 24R    | non          |                       |              |
| 25R    | R102S        | AGA 25 →9 AGC, 57 AGT | 2nd→1st, 4th |
|        | <b>R346K</b> | AGA 25→21 AAA         | 2nd→2nd      |
|        | <b>R357K</b> |                       |              |
|        | R102I        | AGA 25 →29 ATA        |              |
| 26G    | G1251V       | GGA 26 →30 GTA        |              |
| 27stop |              |                       |              |
| 28L    | non          |                       |              |
| 29I    | non          |                       |              |
| 30V    | V687L        | GTA 30→28 CTA, 31 TTA | 2nd→2nd, 2nd |
|        | V1177I       | GTA 30 →29 ATA        | 2nd→2nd      |
|        | V1104L       | GTA 30 →31 TTA        |              |
| 31L    | non          |                       |              |

|        |                |                                  |                      |  |
|--------|----------------|----------------------------------|----------------------|--|
| 32P    | non            |                                  |                      |  |
| 33T    | non            |                                  |                      |  |
| 34A    | A879V          | GCG 34 →46 GTG                   | 3rd→3rd              |  |
| 35S    | S221L          | TCG 35 →47 TTG                   |                      |  |
| 36Q    | Q14H           | CAG 36 →4 CAC,<br>52 CAT         | 3rd→1st, 4th         |  |
|        | Q218H          |                                  |                      |  |
|        | Q1208H         |                                  |                      |  |
|        | Q173K          | CAG 36→ 37AAG                    | 3rd→3rd              |  |
|        | Q52R           | CAG 36 →40 CGG                   |                      |  |
| 37K    | K558N          | AAG 37 →5 AAC,<br>53 AAT         | 3rd→1st, 4th         |  |
|        | K1073T         | AAG 37→33 ACG                    | 3rd→3rd              |  |
| 38E    | E96D           | GAG 38 →6 GAC,<br>54 GAT         | 3rd→1st, 4th         |  |
| 39stop |                |                                  |                      |  |
| 40R    | non            |                                  |                      |  |
| 41R    | R190M          | AGG 41 →45 ATG                   | 3rd→3rd              |  |
| 42G    | non            |                                  |                      |  |
| 43W    | W152R          | TGG 43→40 CGG,<br>41 AGG         | 3rd→3rd, 3rd         |  |
| 44L    | non            |                                  |                      |  |
| 45M    | M731I          | ATG 45→13 ATC,<br>29 ATA, 61 ATT | 3rd→1st, 2nd,<br>4th |  |
|        | M740V          | ATG 45 →46 GTG                   | 3rd→3rd              |  |
|        | M1237T         | ATG 45 →33 ACG                   | 3rd→3rd              |  |
| 46V    | V213L          | GTG 46→44 CTG,<br>47 TTG         | 3rd→3rd, 3rd         |  |
|        | <b>V382L</b>   |                                  |                      |  |
|        | V1122L         |                                  |                      |  |
| 47L    | L141F          | TTG 47 →15 TTC,<br>63 TTT        | 3rd→1st, 4th         |  |
|        | L1063F         |                                  |                      |  |
|        | L1224F         |                                  |                      |  |
| 48P    | P251S          | CCT 48 →51 TCT                   | 4th→4th              |  |
|        | <b>P330S</b>   |                                  |                      |  |
|        | <b>P384S</b>   |                                  |                      |  |
|        | <b>P479S</b>   |                                  |                      |  |
|        | P631S          | CCT 48 →60 CTT                   |                      |  |
|        | <b>P384L</b>   |                                  |                      |  |
|        | P681L          |                                  |                      |  |
| P681H  | CCT 48 →52 CAT |                                  |                      |  |
| 49T    | T76N           | ACT 49 →53 AAT                   |                      |  |
|        | T51I           | ACT 49 →61 ATT                   |                      |  |
|        | T76I           |                                  |                      |  |



|     |              |                          |              |
|-----|--------------|--------------------------|--------------|
|     | T240I        |                          |              |
|     | T676I        |                          |              |
|     | T678I        |                          |              |
|     | T719I        |                          |              |
|     | T747I        |                          |              |
| 50A | A67S         | GCT 50 →51 TCT           |              |
|     | A243S        |                          |              |
|     | A575S        |                          |              |
|     | A771S        |                          |              |
|     | A899S        |                          |              |
|     | A672V        | GCT 50 →62 GTT           |              |
|     | A706V        |                          |              |
|     | A846V        |                          |              |
|     | A892V        |                          |              |
|     | A1020V       |                          |              |
| 51S | S71F         | TCT 51 → 63 TTT          |              |
|     | S884F        |                          |              |
| 52H | H69Y         | CAT 52 →55 TAT           |              |
|     | H245Y        |                          |              |
| 53N | <b>N440K</b> | AAT 53→21 AAA,<br>37 AAG | 4th→2nd, 3rd |
|     | <b>N501Y</b> | AAT 53 →55 TAT           | 4th→4th      |
| 54D | D796H        | GAT 54 →52 CAT           | 4th→4th      |
|     | D111N        | GAT 54 →53 AAT           |              |
|     | D796Y        | GAT 54 →55 TAT           |              |
|     | D574Y        |                          |              |
|     | D839Y        |                          |              |
|     | D1084Y       |                          |              |
|     | D1153Y       |                          |              |
|     | D80G         | GAT 54 →58 GGT           |              |
|     | D198G        |                          |              |
|     | D614G        |                          |              |
| 55Y | <b>Y453F</b> | TAT 55 →63 TTT           |              |
| 56R | R214L        | CGT 56 →60 CTT           |              |
| 57S | S689I        | AGT 57 →61 ATT           |              |
|     | S929T        | AGT 57 →49 ACT           |              |
| 58G | G1167A       | GGT 58 →50 GCT           |              |
|     | G257D        | GGT 58 →54 GAT           |              |
|     | G184S        | GGT 58 →57 AGT           |              |
|     | G639S        |                          |              |
|     | G142V        | GGT 58 →62 GTT           |              |
|     | G252V        |                          |              |

|     |              |                 |
|-----|--------------|-----------------|
|     | G261V        |                 |
|     | <b>G446V</b> |                 |
|     | G1124V       |                 |
|     | G1219V       |                 |
| 59C | C1243F       | TGT 59 → 63 TTT |
|     | C1247F       |                 |
|     | C1250F       |                 |
| 60L | L822F        | CTT 60 → 63 TTT |
|     | L938F        |                 |
| 61I | I233V        | ATT 61 → 62 GTT |
|     | I720V        |                 |
|     | I818V        |                 |
| 62V | V6A          | GTT 62 → 50 GCT |
|     | V3G          | GTT 62 → 58 GGT |
|     | V6F          | GTT 62 → 63 TTT |
|     | V90F         |                 |
|     | V1040F       |                 |
| 63F | <b>F490S</b> | TTT 63 → 51 TCT |
|     | F565L        | TTT 63 → 60 CTT |
|     | F888L        |                 |

<sup>a</sup>Some amino acid replacements (e.g., H146Q, Q23H, and V213L) have more than one mutant, probably a single point mutation. Only one of them is an actual mutant. Variants listed in boldface indicate amino acid replacements within the receptor-binding domain.

Table S5: Full details for the real Alpha to Omicron lineages of SARS-CoV-2.

| Lineage        | Amino acid replacement <sup>a</sup>    | Replacement-related plane No. in Figure 1 |
|----------------|----------------------------------------|-------------------------------------------|
| B.1.1.7<br>(α) | GAC 6 → 4 CAC (D1118H)                 | 1st → 1st                                 |
|                | ACA 17 → 29 ATA (T716I)                | 2nd → 2nd                                 |
|                | TCA 19 → 18 GCA (S982A)                |                                           |
|                | CCT 48 → 52 CAT (P681H)                | 4th → 4th                                 |
|                | GCT 50 → 54 GAT (A570D)                |                                           |
|                | AAT 53 → 55 TAT ( <b>N501Y</b> )       |                                           |
|                | GAT 54 → 58 GGT (D614G)                |                                           |
| B.1.351<br>(β) | GCA 18 → 30 GTA (A701V)                | 2nd → 2nd                                 |
|                | GAA 22 → 21 AAA ( <b>E484K</b> )       |                                           |
|                | AAG 37 → 5 AAC, 53AAT ( <b>K417N</b> ) | 3rd → 1st, 4th                            |
|                | AAT 53 → 55 TAT ( <b>N501Y</b> )       | 4th → 4th                                 |
|                | GAT 54 → 50 GCT (D80A)                 |                                           |
|                | GAT 54 → 58 GGT (D215G, D614G)         |                                           |

|                  |                                                       |                          |
|------------------|-------------------------------------------------------|--------------------------|
| P.1<br>(γ)       | ACC 1 → 5 AAC (T20N)                                  | 1st → 1st                |
|                  | GAA 22 → 21 AAA ( <b>E484K</b> )                      | 2nd → 2nd                |
|                  | AAG 37 → 33 ACG ( <b>K417T</b> )                      | 3rd → 3rd                |
|                  | AGG 41 → 9 AGC, 57 AGT (R190S)                        | 3rd→1st, 4th             |
|                  | CCT 48 → 51TCT (P26S)                                 | 4th → 4th                |
|                  | ACT 49 → 61ATT (T1027I)                               |                          |
|                  | CAT 52 → 55TAT (H655Y)                                |                          |
|                  | AAT 53 → 55 TAT ( <b>N501Y</b> )                      |                          |
|                  | GAT 54 → 55 TAT (D138Y)                               |                          |
|                  | GAT 54 → 58 GGT (D614G)                               |                          |
|                  | CTT 60 → 63 TTT (L18F)                                |                          |
|                  | GTT 62 → 63 TTT (V1176F)                              |                          |
| B.1.617.2<br>(δ) | ACA 17 → 21 AAA ( <b>T478K</b> )                      | 2nd → 2nd                |
|                  | ACA 17 → 25 AGA (T19R)                                |                          |
|                  | GAG 38 → 42 GGG (E156G)                               | 3rd → 3rd                |
|                  | CTG 44 → 40 CGG ( <b>L452R</b> )                      |                          |
|                  | CCT 48 → 56 CGT (P681R)                               | 4th → 4th                |
|                  | GAT 54 → 58 GGT (D614G)                               |                          |
|                  | GAT 54 → 53 AAT (D950N)                               |                          |
| C.37<br>(λ)      | GGT 58 → 54 GAT (G142D)                               |                          |
|                  | CTG 44 → 36 CAG( <b>L452Q</b> )                       | 3rd → 3rd                |
|                  | ACT 49 → 53 AAT(T859N)                                | 4th → 4th                |
|                  | ACT 49 → 61 ATT(T76I)                                 |                          |
|                  | GAT 54 → 58 GGT (D614G)                               |                          |
|                  | GGT 58 → 62 GTT(G75V)                                 |                          |
| B.1.1.529<br>(o) | TTT 63 → 51 TCT( <b>F490S</b> )                       |                          |
|                  | TCC 3 → 15 TTC ( <b>S375F</b> )                       | 1st → 1st                |
|                  | AAC 5 → 21 AAA, 37 AAG (N764K)                        | 1st→2nd, 3rd             |
|                  | TAC 7 → 4 CAC ( <b>Y505H</b> )                        | 1st → 1st                |
|                  | AGC 9 → 5 AAC ( <b>S477N</b> )                        |                          |
|                  | ACA 17 → 21 AAA ( <b>T478K</b> )                      | 2nd → 2nd                |
|                  | TCA 19 → 16 CCA ( <b>S373P</b> )                      |                          |
|                  | CAA 20 → 4 CAC, 52CAT (Q954H)                         | 2nd →1st, 4th            |
|                  | CAA 20 → 24 CGA ( <b>Q498R</b> )                      | 2nd → 2nd                |
|                  | GAA 22 → 18 GCA ( <b>E484A</b> )                      |                          |
|                  | AAG 37 → 5 AAC, 53AAU( <b>K417N</b> )                 | 3rd→1st, 4th             |
|                  | CCT 48 → 52 CAT (P681H)                               | 4th →4th                 |
|                  | CAT 52 → 55 TAT (H655Y)                               | 4th →4th<br>4th→2nd, 3rd |
|                  | AAT 53→21 AAA, 37 AAG<br>( <b>N440K</b> ,N679K,N969K) |                          |
|                  | AAT 53 → 55 TAT ( <b>N501Y</b> )                      | 4th → 4th                |
|                  | GAT 54→ 55 TAT (D796Y)                                | 4th → 4th                |

|  |                                       |  |
|--|---------------------------------------|--|
|  | GAT 54→ 58 GGT (D614G)                |  |
|  | GGT 58→ 54 GAT (G142D, <b>G339D</b> ) |  |
|  |                                       |  |

<sup>a</sup>Some amino acid replacements (e.g., H146Q, Q23H, V213L) had more than one mutant, probably a single point mutation. Only one of them is an actual mutant. Variants listed in boldface indicate amino acid replacements within the receptor-binding domain of the S-protein.
